# Supplementary material for: Burden of hepatitis E virus infection in pregnancy and maternofoetal outcomes: a systematic review and meta-analysis
Source: Springer Nature journal article supplement (doi:10.1186/s12884-020-03116-2), 2020-07-28
Supplement: MOESM1 [file 18226170]

# **Burden of hepatitis E virus infection in pregnancy and maternofetal outcomes: a systematic review and meta-analysis**

Jean Joel Bigna, MD, MPH; Abdou Fatawou Modiyinji, MSc; Jobert Richie Nansseu, MD; Marie A. Amougou, MSc; Moise Nola, MSc, PhD; Sébastien Kenmoe, MSc, PhD; Elvis Temfack, MD, MSc, PhD; Richard Njouom, MSc, PhD

---

## **APPENDIX**

---

|                                                                                                                                                                                            |    |
|--------------------------------------------------------------------------------------------------------------------------------------------------------------------------------------------|----|
| SUPPLEMENTARY TABLE 1. <b>SEARCH STRATEGY IN PUBMED</b> .....                                                                                                                              | 2  |
| SUPPLEMENTARY TABLE 2 : <b>RISK OF BIAS TOOL</b> .....                                                                                                                                     | 3  |
| SUPPLEMENTARY TABLE 3 : <b>RISK OF BIAS ON STUDY INVESTIGATING THE ASSOCIATION BETWEEN HEV INFECTION AND MATERNOFETAL OUTCOMES</b> .....                                                   | 5  |
| SUPPLEMENTARY TABLE 4 : <b>INDIVIDUAL CHARACTERISTICS OF STUDIES INCLUDED IN THE META-ANALYSIS PREVALENCE OF HEV INFECTION IN THE GLOBAL POPULATION OF PREGNANT WOMEN</b> .....            | 6  |
| SUPPLEMENTARY TABLE 5 : <b>INDIVIDUAL CHARACTERISTICS OF STUDIES INCLUDED IN THE META-ANALYSIS OF PREGNANCY OUTCOMES IN HEV INFECTION IN THE GLOBAL POPULATION OF PREGNANT WOMEN</b> ..... | 9  |
| SUPPLEMENTARY TABLE 6 : <b>CHARACTERISTICS OF STUDIES INCLUDED IN THE META-ANALYSIS</b> .....                                                                                              | 10 |
| <br>                                                                                                                                                                                       |    |
| SUPPLEMENTARY FIGURE 1 : <b>THE REVIEW PROCESS</b> .....                                                                                                                                   | 10 |
| SUPPLEMENTARY FIGURE 2 : <b>FUNNEL PLOT FOR HEV PREVALENCE IN ASYMPTOMATIC PREGNANT WOMEN</b> .....                                                                                        | 12 |
| SUPPLEMENTARY FIGURE 3 : <b>FUNNEL PLOT FOR HEV PREVALENCE IN SYMPTOMATIC PREGNANT WOMEN</b> .....                                                                                         | 12 |

Supplementary Table 1. Search strategy in PubMed

| <b>Search</b> | <b>Search terms</b>                                                                                              |
|---------------|------------------------------------------------------------------------------------------------------------------|
| #1            | "hepatitis E" OR "viral hepatitis E" OR "hepatitis E virus" OR "hepatitis E antibody" OR "hepatitis E antigen"   |
| #2            | "hepatitis non A non B" OR "hepatitis non A non B non C" OR "hepatitis virus non A non B"                        |
| #3            | #1 OR #2                                                                                                         |
| #4            | "pregnancy" OR "pregnant women" OR "antenatal" OR pregnan* OR "prenatal" OR gravidity OR parturition OR maternal |
| #5            | Fetal OR foetal OR fetomaternal OR maternofetal OR maternofetal OR foeto-maternal OR fetus                       |
| #6            | #4 OR #5                                                                                                         |
| #7            | #3 AND #6                                                                                                        |

Supplementary Table 2 : Risk of bias tool

| Risk of Bias Item                                                                                                                                                                                                                                                                                                                                                 | Yes (Low Risk) or No (High risk) |
|-------------------------------------------------------------------------------------------------------------------------------------------------------------------------------------------------------------------------------------------------------------------------------------------------------------------------------------------------------------------|----------------------------------|
|                                                                                                                                                                                                                                                                                                                                                                   |                                  |
| <b>External Validity</b>                                                                                                                                                                                                                                                                                                                                          |                                  |
| 1. Was the study target population a close representation of the pregnant population in relation to relevant variables?                                                                                                                                                                                                                                           |                                  |
| 2. Was the sampling frame a true or close representation of the target population?                                                                                                                                                                                                                                                                                |                                  |
| 3. Was some form of random selection used to select the sample, OR, was a census undertaken?                                                                                                                                                                                                                                                                      |                                  |
| 4. Was the likelihood of non-participation bias minimal?                                                                                                                                                                                                                                                                                                          |                                  |
| <b>Internal Validity</b>                                                                                                                                                                                                                                                                                                                                          |                                  |
| 5. Were data collected directly from the subjects (as opposed to medical records)?                                                                                                                                                                                                                                                                                |                                  |
| 6. Were acceptable case definition of HEV used?                                                                                                                                                                                                                                                                                                                   |                                  |
| 7. Was a reliable and accepted diagnosis method for HEV utilised?                                                                                                                                                                                                                                                                                                 |                                  |
| 8. Was the same mode of data collection used for all subjects?                                                                                                                                                                                                                                                                                                    |                                  |
| 9. Was the length of the shortest prevalence period for the parameter of interest appropriate?                                                                                                                                                                                                                                                                    |                                  |
| 10. Were the numerator(s) and denominator(s) for the calculation of the prevalence of dyslipidemia appropriate?                                                                                                                                                                                                                                                   |                                  |
| <p>11. Summary item on the overall risk of study bias</p> <p>LOW RISK OF BIAS: 8 or more “yes” answers. Further research is very unlikely to change our confidence in the estimate.</p> <p>MODERATE RISK OF BIAS: 6 to 7 “yes” answers. Further research is likely to have an important impact on our confidence in the estimate and may change the estimate.</p> |                                  |

|                                                                                                                                                                                  |  |
|----------------------------------------------------------------------------------------------------------------------------------------------------------------------------------|--|
| HIGH RISK OF BIAS: 5 or fewer “yes” answers. Further research is very likely to have an important impact on our confidence in the estimate and is likely to change the estimate. |  |
|----------------------------------------------------------------------------------------------------------------------------------------------------------------------------------|--|

Supplementary Table 3 : Risk of bias on study investigating the association between HEV infection and maternofetal outcomes

| Author    | Year | Is there potential for confounding of the effect of HEV in this study? | Did the authors use an appropriate analysis method that controlled for all the important confounding domains? | Bias due to confounding | Was selection of participants into the study (or into the analysis) different between women with HEV and women without HEV? | Bias in selection | Were exposure/non exposure groups clearly defined? | Could classification of HEV exposure or not exposure status have been affected by knowledge of the outcome or risk of the outcome? | Bias in classification of exposure | Were outcome data available for all, or nearly all, participants? | Were participants excluded due to missing data on other variables needed for the analysis? | Bias due to missing data | Could the outcome measure have been influenced by knowledge of the exposure received? | Were outcome assessors aware of the HEV exposure by study participants? | Were the methods of outcome assessment comparable across HEV positive and HEV negative groups? | Bias in Outcome Measurement | Is the reported effect estimate likely to be selected, on the basis of the results, from multiple outcome measurements within the outcome domain? | Is the reported effect estimate likely to be selected, on the basis of the results, from multiple analyses of the exposure-outcome relationship? | Is the reported effect estimate likely to be selected, on the basis of the results, from different subgroups? | Bias in selection of report domain | Global   |
|-----------|------|------------------------------------------------------------------------|---------------------------------------------------------------------------------------------------------------|-------------------------|-----------------------------------------------------------------------------------------------------------------------------|-------------------|----------------------------------------------------|------------------------------------------------------------------------------------------------------------------------------------|------------------------------------|-------------------------------------------------------------------|--------------------------------------------------------------------------------------------|--------------------------|---------------------------------------------------------------------------------------|-------------------------------------------------------------------------|------------------------------------------------------------------------------------------------|-----------------------------|---------------------------------------------------------------------------------------------------------------------------------------------------|--------------------------------------------------------------------------------------------------------------------------------------------------|---------------------------------------------------------------------------------------------------------------|------------------------------------|----------|
| Kumar     | 2014 | Probably No                                                            | No                                                                                                            | Moderate                | No                                                                                                                          | Low               | Yes                                                | No                                                                                                                                 | Low                                | Yes                                                               | No                                                                                         | Low                      | No                                                                                    | No Information                                                          | Yes                                                                                            | Moderate                    | No                                                                                                                                                | No                                                                                                                                               | No                                                                                                            | Low                                | Moderate |
| Devi      | 2014 | Probably No                                                            | No                                                                                                            | Moderate                | No                                                                                                                          | Low               | Yes                                                | No                                                                                                                                 | Low                                | Yes                                                               | No                                                                                         | Low                      | No                                                                                    | No Information                                                          | Yes                                                                                            | Moderate                    | No                                                                                                                                                | No                                                                                                                                               | No                                                                                                            | Low                                | Moderate |
| Bhatnagar | 2016 | Probably No                                                            | No                                                                                                            | Moderate                | No                                                                                                                          | Low               | Yes                                                | No                                                                                                                                 | Low                                | Yes                                                               | No                                                                                         | Low                      | No                                                                                    | No Information                                                          | Yes                                                                                            | Moderate                    | No                                                                                                                                                | No                                                                                                                                               | No                                                                                                            | Low                                | Moderate |
| Javed     | 2017 | Probably No                                                            | No                                                                                                            | Moderate                | No                                                                                                                          | Low               | Yes                                                | No                                                                                                                                 | Low                                | Yes                                                               | No                                                                                         | Low                      | No                                                                                    | No Information                                                          | Yes                                                                                            | Moderate                    | No                                                                                                                                                | No                                                                                                                                               | No                                                                                                            | Low                                | Moderate |
| Patra     | 2007 | Probably No                                                            | No                                                                                                            | Moderate                | No                                                                                                                          | Low               | Yes                                                | No                                                                                                                                 | Low                                | Yes                                                               | No                                                                                         | Low                      | No                                                                                    | No Information                                                          | Yes                                                                                            | Moderate                    | No                                                                                                                                                | No                                                                                                                                               | No                                                                                                            | Low                                | Moderate |

Supplementary Table 4 : Individual characteristics of studies included in the meta-analysis prevalence of HEV infection in the global population of pregnant women

| Author      | Year | Sample | Clinical presentation | Risk of bias | Country  | Period    | Design          | Number of centers     | Area                  | Setting                                                                     | Timing        | Sampling              | Age, y | %HAV  | %HBV   | %HCV   | %HDV | %Nulliparous |
|-------------|------|--------|-----------------------|--------------|----------|-----------|-----------------|-----------------------|-----------------------|-----------------------------------------------------------------------------|---------------|-----------------------|--------|-------|--------|--------|------|--------------|
| Abebe       | 2017 | 386    | None                  | Low          | Ethiopia | 2014-2015 | Cross-sectional | Multi-center          | Urban                 | Other hospital based (not antenatal care)                                   | Prospective   | Consecutive           | 28.9   | NR    | NR     | NR     | NR   | NR           |
| Adjei       | 2009 | 157    | None                  | Moderate     | Ghana    | 2008      | Cross-sectional | Single-center         | Urban                 | Other hospital based (not antenatal care)                                   | Prospective   | Consecutive           | 28.89  | NR    | NR     | NR     | NR   | NR           |
| Ahmed       | 2008 | 60     | AVH                   | Moderate     | Sudan    | 2007      | Cross-sectional | Multi-center          | Urban                 | Other hospital based (not antenatal care)                                   | Prospective   | Consecutive           | 26.8   | NR    | 31.30% | 6.30%  | NR   | NR           |
| Banait      | 2007 | 156    | Liver dysfunction     | Moderate     | India    | 2003-2004 | Cross-sectional | Multi-center          | Urban                 | Other hospital based (not antenatal care)                                   | Retrospective | Unclear/not described | 25.5   | NR    | 1.30%  | NR     | NR   | 28.6         |
| Beniwal     | 2003 | 97     | Liver dysfunction     | Moderate     | India    | 2000-2002 | Cross-sectional | Single-center         | Urban                 | Other hospital based (not antenatal care)                                   | Prospective   | Consecutive           | NR     | 5.20% | 7.20%  | 0      | NR   | 0            |
| Bhatia      | 2008 | 249    | AVH                   | Moderate     | India    | 1986-2006 | Cross-sectional | Multi-center          | Unclear/not described | Other hospital based (not antenatal care)                                   | Retrospective | Consecutive           | 25.6   | 1.20% | 4.80%  | NR     | NR   | NR           |
| Bista       | 2006 | 19     | Jaundice              | High         | Nepal    | 1999-2003 | Cross-sectional | Single-center         | Urban                 | Other hospital based (not antenatal care)                                   | Retrospective | Unclear/not described | 24     | NR    | NR     | NR     | NR   | 62.5         |
| Borkakoti   | 2013 | 585    | AVH and ALF           | Moderate     | India    | 2006-2011 | Cross-sectional | Single-center         | Urban                 | Other hospital based (not antenatal care)                                   | Prospective   | Unclear/not described | 24.6   | 1.40% | 2.40%  | 8.20%  | NR   | NR           |
| Brohi       | 2013 | 52     | FHF                   | Moderate     | Pakistan | 2009-2010 | Cross-sectional | Single-center         | Urban, Rural          | Other hospital based (not antenatal care)                                   | Prospective   | Unclear/not described | 29.04  | NR    | 17.30% | 13.50% | NR   | NR           |
| Cevrioglu   | 2004 | 245    | None                  | Moderate     | Turkey   | 2000-2002 | Cross-sectional | Multi-center          | Urban, Rural          | Other hospital based (not antenatal care)                                   | Prospective   | Unclear/not described | 26.3   | NR    | NR     | NR     | NR   | NR           |
| Changede    | 2018 | 43     | Jaundice              | Moderate     | India    | 2016      | Cross-sectional | Single-center         | Urban, Rural          | Other hospital based (not antenatal care)                                   | Retrospective | Unclear/not described | NR     | 2.30% | 4.60%  | NR     | NR   | 51           |
| Cong        | 2015 | 990    | None                  | Moderate     | China    | 2011-2013 | Cross-sectional | Multi-center          | Urban, Rural          | Antenatal care, Other hospital based (not antenatal care)                   | Prospective   | Consecutive           | NR     | NR    | NR     | NR     | NR   | NR           |
| Cordova     | 2007 | 20     | None                  | Moderate     | Brazil   | 2004      | Cross-sectional | Multi-center          | Urban                 | Other hospital based (not antenatal care)                                   | Prospective   | Unclear/not described | NR     | NR    | NR     | NR     | NR   | NR           |
| De Paschale | 2016 | 278    | None                  | Moderate     | Benin    | 2011      | Cross-sectional | Single-center         | Rural                 | Other hospital based (not antenatal care)                                   | Retrospective | Unclear/not described | 26.2   | 0     | NR     | NR     | NR   | 19           |
| Devi        | 2014 | 262    | AVH                   | Moderate     | India    | NR        | Cross-sectional | Multi-center          | Unclear/not described | Antenatal care, Other hospital based (not antenatal care)                   | Prospective   | Unclear/not described | NR     | NR    | NR     | NR     | NR   | NR           |
| Elduma      | 2014 | 39     | Fever                 | Moderate     | Sudan    | 2012      | Cross-sectional | Single-center         | Urban                 | Other hospital based (not antenatal care)                                   | Prospective   | Unclear/not described | 26     | NR    | NR     | NR     | NR   | NR           |
| Farshadpour | 2018 | 1331   | None                  | Low          | Iran     | 2016-2017 | Cross-sectional | Multi-center          | Urban                 | Other hospital based (not antenatal care), Population/Community-based study | Prospective   | Consecutive           | 27.93  | NR    | NR     | NR     | NR   | 5.1          |
| Hamid       | 1996 | 12     | AVH                   | Moderate     | Pakistan | 1991-1994 | Cross-sectional | Unclear/not described | Urban                 | Unclear/not described                                                       | Prospective   | Unclear/not described | 25     | 8.30% | 16.70% | 0      | NR   | 25           |
| Hannachi    | 2011 | 404    | None                  | Low          | Tunisia  | 2006      | Cross-sectional | Single-center         | Urban, Rural          | Antenatal care                                                              | Prospective   | Consecutive           | 30.08  | 10%   | 0.03   | 0.50%  | NR   | NR           |

|              |      |      |                                     |          |                      |           |                 |                       |                       |                                                           |               |                       |       |        |        |       |       |    |
|--------------|------|------|-------------------------------------|----------|----------------------|-----------|-----------------|-----------------------|-----------------------|-----------------------------------------------------------|---------------|-----------------------|-------|--------|--------|-------|-------|----|
| Huang        | 2015 | 274  | None                                | High     | China                | 2015      | Cross-sectional | Single-center         | Urban                 | Population/Community-based study                          | Prospective   | Unclear/not described | NR    | NR     | NR     | NR    | NR    | NR |
| Huang        | 2013 | 293  | None                                | Moderate | China                | NR        | Cross-sectional | Single-center         | Urban                 | Unclear/not described                                     | Prospective   | Unclear/not described | 27.9  | NR     | NR     | NR    | NR    | NR |
| Jaiswal      | 2001 | 127  | AVH and FHF                         | Moderate | India                | 1992_1999 | Cross-sectional | Single-center         | Urban                 | Other hospital based (not antenatal care)                 | Prospective   | Consecutive           | NR    | 0      | 18.89% | 0     | 0.78% | NR |
| Javed        | 2017 | 135  | Jaundice or abnormal liver function | Moderate | Pakistan             | 2015      | Cross-sectional | Multi-center          | Urban                 | Other hospital based (not antenatal care)                 | Prospective   | Unclear/not described | 29.2  | NR     | 5.20%  | 5.20% | NR    | 15 |
| Jilani       | 2007 | 50   | FHF                                 | Moderate | India                | NR        | Cross-sectional | Multi-center          | Unclear/not described | Other hospital based (not antenatal care)                 | Prospective   | Unclear/not described | 24.8  | 0.02   | 0      | 0     | NR    | NR |
| Junaid       | 2014 | 108  | None                                | Moderate | Nigeria              | NR        | Cross-sectional | Single-center         | Urban, Rural          | Population/Community-based study                          | Prospective   | Non-probability       | NR    | NR     | NR     | NR    | NR    | NR |
| Kar          | 2008 | 125  | Jaundice                            | Low      | India                | NR        | Cross-sectional | Multi-center          | Urban                 | Antenatal care, Other hospital based (not antenatal care) | Prospective   | Consecutive           | 24.8  | 12%    | 0.08   | 0.02  | NR    | NR |
| Khuroo       | 2003 | 49   | ALF                                 | Low      | India                | 1989-1996 | Cross-sectional | Single-center         | Urban                 | Other hospital based (not antenatal care)                 | Prospective   | Consecutive           | 31.1  | 2.20%  | 13.90% | 7.20% | 1.10% | NR |
| Khuroo       | 2003 | 76   | AVH                                 | Low      | India                | 1993-1996 | Cross-sectional | Single-center         | Urban                 | Other hospital based (not antenatal care)                 | Prospective   | Systematic            | 27.7  | 1.50%  | 0.15   | 1.70% | 1.50% | NR |
| Kumar        | 2004 | 62   | Jaundice                            | Moderate | India                | 2001-2002 | Cross-sectional | Unclear/not described | Unclear/not described | Antenatal care, Other hospital based (not antenatal care) | Prospective   | Consecutive           | 24.5  | 0      | 4.80%  | 0     | NR    | NR |
| Kumar        | 2011 | 24   | None                                | Moderate | India                | 2002-2006 | Cross-sectional | Single-center         | Urban                 | Unclear/not described                                     | Retrospective | Unclear/not described | NR    | 0      | 8.30%  | 0     | NR    | NR |
| Kumar        | 2017 | 256  | Jaundice                            | Moderate | India                | 2011-2014 | Cross-sectional | Multi-center          | Urban                 | Antenatal care, Other hospital based (not antenatal care) | Prospective   | Consecutive           | 24.6  | 0.07%  | 3.40%  | 3.40% | NR    | 0  |
| Kumar        | 2007 | 24   | Jaundice                            | High     | India                | 2002-2006 | Cross-sectional | Single-center         | Urban                 | Other hospital based (not antenatal care)                 | Prospective   | Unclear/not described | NR    | 14.60% | 12.20% | 3.60% | NR    | NR |
| Kumar        | 2017 | 177  | Jaundice                            | Moderate | India                | 2016      | Cross-sectional | Single-center         | Urban                 | Other hospital based (not antenatal care)                 | Retrospective | Unclear/not described | 25    | 0.40%  | 30.50% | 8.40% | NR    | NR |
| Kumar        | 2001 | 469  | None                                | Low      | United Arab Emirates | NR        | Cross-sectional | Single-center         | Urban                 | Antenatal care                                            | Prospective   | Consecutive           | 25    | NR     | NR     | NR    | NR    | NR |
| Lindemann    | 2010 | 1040 | None                                | Moderate | Spain                | 2007-2010 | Cross-sectional | Single-center         | Urban                 | Other hospital based (not antenatal care)                 | Prospective   | Unclear/not described | 30.6  | NR     | NR     | NR    | NR    | NR |
| Mahtab       | 2009 | 31   | AVH                                 | Moderate | Bangladesh           | 2004-2006 | Cross-sectional | Single-center         | Urban                 | Other hospital based (not antenatal care)                 | Retrospective | Consecutive           | NR    | 4.86%  | 27.80% | NR    | NR    | NR |
| Neffati      | 2017 | 216  | None                                | Low      | Tunisia              | 2014-2015 | Cross-sectional | Multi-center          | Urban                 | Antenatal care                                            | Prospective   | Consecutive           | 32    | 9.80%  | NR     | NR    | NR    | NR |
| Obiri-Yeboah | 2018 | 398  | None                                | Moderate | Ghana                | NR        | Cross-sectional | Multi-center          | Urban, Rural          | Antenatal care                                            | Prospective   | Systematic            | 28.01 | NR     | NR     | NR    | NR    | NR |
| Oncu         | 2006 | 386  | None                                | Moderate | Turkey               | NR        | Cross-sectional | Multi-center          | Urban, Rural          | Other hospital based (not antenatal care)                 | Prospective   | Multistage sampling   | 24.28 | NR     | NR     | NR    | NR    | NR |
| Patra        | 2007 | 220  | Jaundice                            | Low      | India                | 2003-2005 | Cross-sectional | Multi-center          | Urban                 | Other hospital based (not antenatal care)                 | Prospective   | Consecutive           | 22.4  | NR     | NR     | NR    | NR    | NR |
| Pujol        | 1994 | 184  | None                                | Moderate | Venezuela            | 1991-1992 | Cross-sectional | Multi-center          | Urban, Rural          | Other hospital based (not antenatal care)                 | Prospective   | Unclear/not described | NR    | NR     | NR     | NR    | NR    | NR |

|         |      |     |                   |          |           |           |                                        |                       |                       |                                           |             |                       |       |       |       |       |    |    |
|---------|------|-----|-------------------|----------|-----------|-----------|----------------------------------------|-----------------------|-----------------------|-------------------------------------------|-------------|-----------------------|-------|-------|-------|-------|----|----|
| Rathi   | 2007 | 107 | Liver dysfunction | Moderate | India     | 2002-2004 | Cross-sectional                        | Single-center         | Urban                 | Other hospital based (not antenatal care) | Prospective | Consecutive           | NR    | NR    | 4.20% | 4.20% | NR | NR |
| Renou   | 2014 | 315 | None              | Moderate | France    | NR        | Cross-sectional                        | Multi-center          | Unclear/not described | Other hospital based (not antenatal care) | Prospective | Unclear/not described | NR    | NR    | NR    | NR    | NR | NR |
| Sahai   | 2015 | 68  | AVL               | Moderate | India     | 2007-2009 | Cross-sectional                        | Unclear/not described | Unclear/not described | Unclear/not described                     | Prospective | Consecutive           | NR    | 0     | 7.40% | 1.50% | NR | NR |
| Salam   | 2013 | 272 | Jaundice          | High     | India     | 2008-2011 | Cross-sectional                        | Multi-center          | Unclear/not described | Antenatal care                            | Prospective | Unclear/not described | 24.76 | 1.80% | 8.80% | 2.70% | NR | NR |
| Singh   | 2003 | 60  | AVH               | Moderate | India     | 1997-1998 | Cross-sectional                        | Multi-center          | Urban                 | Other hospital based (not antenatal care) | Prospective | Unclear/not described | 24    | 0     | 0.1   | 0     | NR | NR |
| Solanke | 2016 | 103 | Liver dysfunction | Moderate | India     | 2013-2015 | Cross-sectional                        | Unclear/not described | Urban                 | Other hospital based (not antenatal care) | Prospective | Consecutive           | 25    | NR    | NR    | NR    | NR | NR |
| Strand  | 2003 | 60  | Both              | Moderate | Angola    | 1999      | Case-control (group of pregnant women) | Multi-center          | Urban                 | Other hospital based (not antenatal care) | Prospective | Consecutive           | 21.9  | NR    | 0.1   | 0     | NR | 55 |
| Sultana | 2014 | 38  | Jaundice          | Moderate | Pakistan  | 2012-2013 | Cross-sectional                        | Single-center         | Urban                 | Other hospital based (not antenatal care) | Prospective | Unclear/not described | 25    | 12%   | NR    | NR    | NR | 40 |
| Surya   | 2005 | 819 | None              | Moderate | Indonesia | 2003      | Cross-sectional                        | Multi-center          | Urban                 | Other hospital based (not antenatal care) | Prospective | Unclear/not described | 27    | NR    | 1.90% | 0.04% | NR | NR |

NR: not reported; AVH: acute viral hepatitis, FHF: fulminant hepatitis failure; ALF: acute liver failure



Supplementary Table 5 : Individual characteristics of studies included in the meta-analysis of pregnancy outcomes in HEV infection in the global population of pregnant women

| Author           | Year of publication | Country  | Design          | Number of centers | Area                  | Setting                                                   | Timing of data collection | Period    | Sampling              | Age HEV+ | Age HEV - | %HAV in HEV+ | %HAV in HEV- | %HBV in HEV+ | %HBV in HEV- | %HCV in HEV+ | %HCV in HEV- | %HDV in HEV+ | %HDV in HEV- | %HIV in HEV+ | %HIV in HEV- | %Nulliparous in HEV+ | %Nulliparous in HEV- |    |
|------------------|---------------------|----------|-----------------|-------------------|-----------------------|-----------------------------------------------------------|---------------------------|-----------|-----------------------|----------|-----------|--------------|--------------|--------------|--------------|--------------|--------------|--------------|--------------|--------------|--------------|----------------------|----------------------|----|
| <b>Patra</b>     | 2007                | India    | Cross-sectional | Multi-center      | Urban                 | Other hospital based (not antenatal care)                 | Prospective               | 2003-2005 | Consecutive           | NR       | NR        | NR           | NR           | NR           | NR           | NR           | NR           | NR           | NR           | NR           | NR           | NR                   | NR                   | NR |
| <b>Kumar</b>     | 2014                | India    | Cross-sectional | Multi-center      | Unclear/not described | Antenatal care, Other hospital based (not antenatal care) | Unclear/not described     | NR        | Unclear/not described | NR       | NR        | NR           | NR           | NR           | NR           | NR           | NR           | NR           | NR           | NR           | NR           | NR                   | NR                   | NR |
| <b>Devi</b>      | 2014                | India    | Cross-sectional | Multi-center      | Unclear/not described | Antenatal care, Other hospital based (not antenatal care) | Unclear/not described     | NR        | Unclear/not described | NR       | NR        | NR           | NR           | NR           | NR           | NR           | NR           | NR           | NR           | NR           | NR           | NR                   | NR                   | NR |
| <b>Bhatnagar</b> | 2016                | India    | Cross-sectional | Multi-center      | Urban                 | Antenatal care, Other hospital based (not antenatal care) | Prospective               | 2012-2014 | Consecutive           | 24.10    | 25.57     | NR           | NR           | NR           | NR           | NR           | NR           | NR           | NR           | NR           | NR           | NR                   | NR                   | NR |
| <b>Javed</b>     | 2017                | Pakistan | Cross-sectional | Multi-center      | Unclear/not described | Unclear/not described                                     | Prospective               | 2015      | Unclear/not described | 29.2     | 28.6      | NR           | NR           | 2.2%         | 3.0%         | 0.7%         | 4.4%         | NR           | NR           | NR           | NR           | NR                   | NR                   | NR |

NR: Not reported

Supplementary Table 6 : *Characteristics of studies included in the meta-analysis*

| <b>Characteristics</b>           | <b>N = 54</b>      |
|----------------------------------|--------------------|
| Year of publication, range       | 1994-2018          |
| Period of recruitment, range     | 1986-2017 (n = 42) |
| % of Nulliparous                 | 0 – 62.5 (n = 11)  |
| <b>Clinical profile</b>          |                    |
| - Asymptomatic                   | 24                 |
| - Symptomatic                    | 29                 |
| - Both                           | 1                  |
| <b>WHO Regions</b>               |                    |
| - South-East Asia                | 25                 |
| - Eastern Mediterranean          | 10                 |
| - Africa                         | 7                  |
| - Europe                         | 4                  |
| - Americas                       | 3                  |
| - Western Pacific                | 3                  |
| <b>Design</b>                    |                    |
| - Cross sectional                | 53                 |
| - Case control                   | 1                  |
| <b>Setting</b>                   |                    |
| - Antenatal care                 | 14                 |
| - Hospital-based                 | 34                 |
| - Population-based               | 2                  |
| - Unclear                        | 4                  |
| <b>Timing of data collection</b> |                    |
| - Prospective                    | 45                 |
| - Retrospective                  | 9                  |
| <b>Sampling method</b>           |                    |
| - Consecutive                    | 25                 |
| - Multistage random              | 1                  |
| - Random sampling                | 1                  |
| - Systematic                     | 2                  |
| - Unclear                        | 25                 |

Supplementary Figure 1 : *The review process*

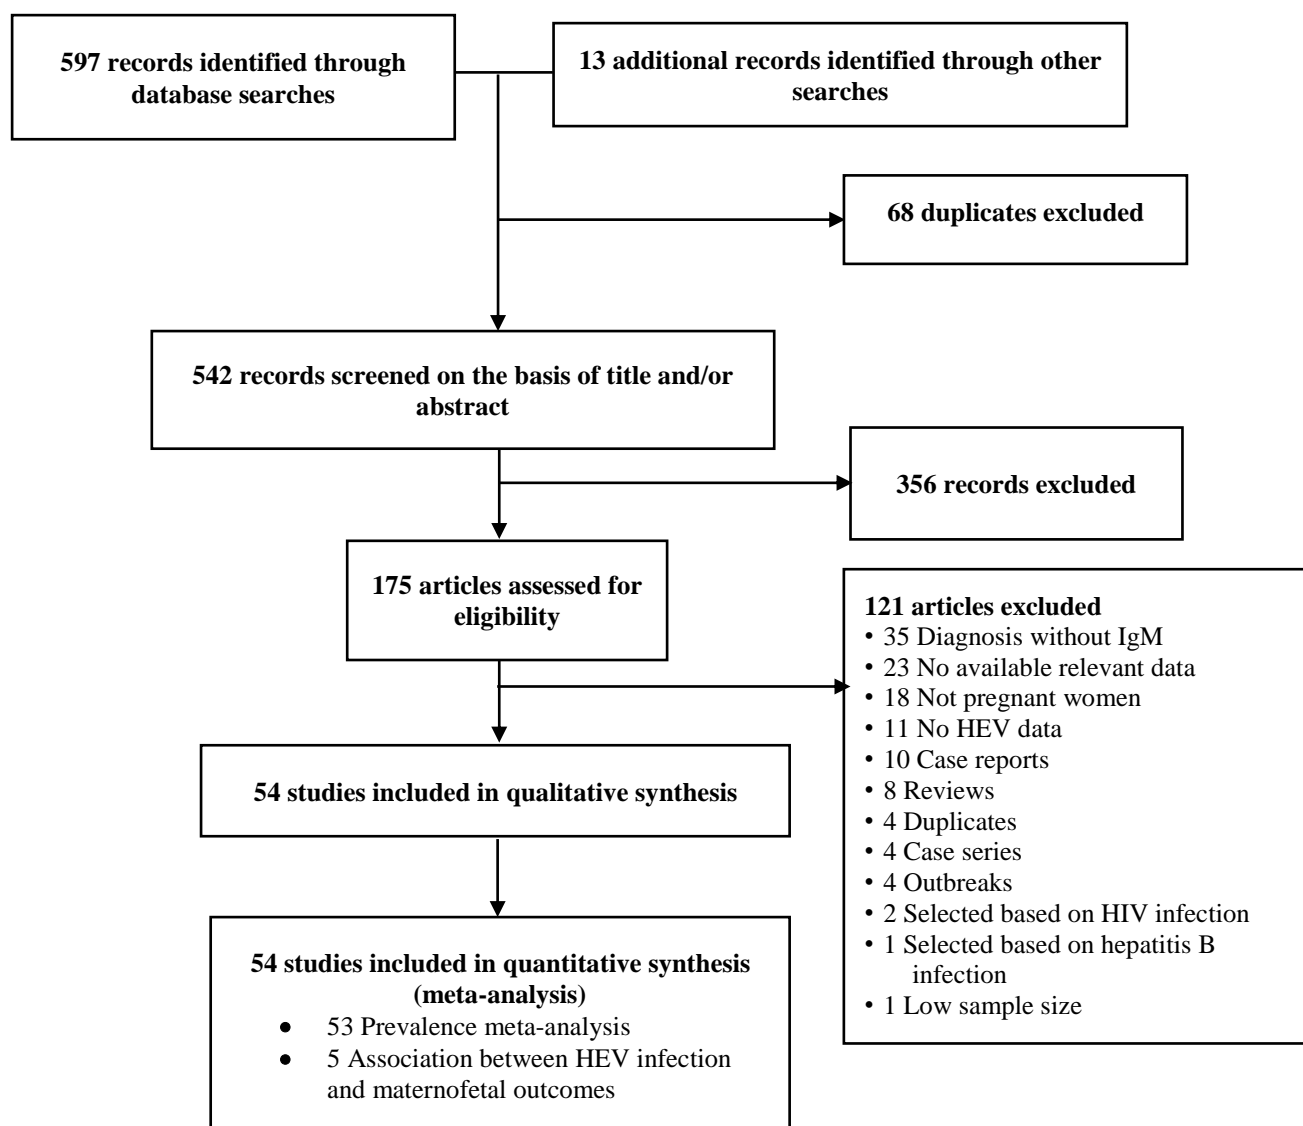

Supplementary Figure 2 : Funnel plot for HEV prevalence in asymptomatic pregnant women

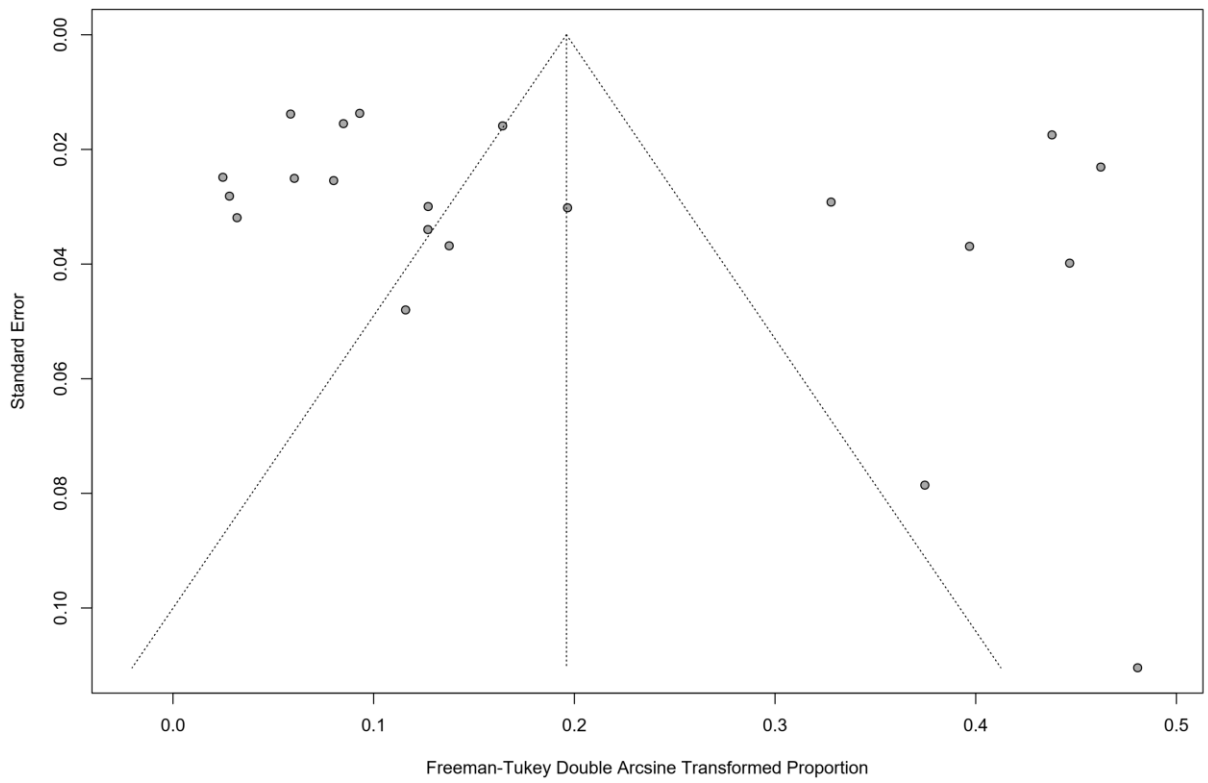

Supplementary Figure 3 : Funnel plot for HEV prevalence in symptomatic pregnant women

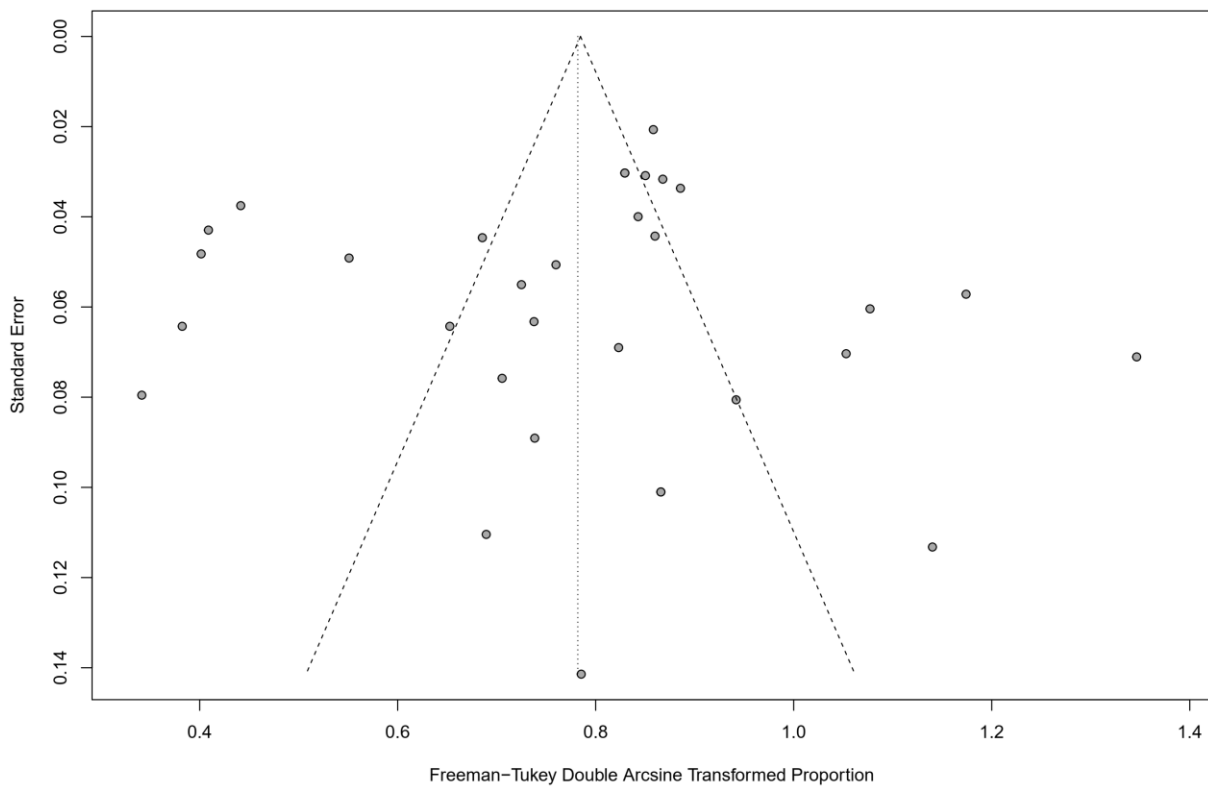

## List of included studies<sup>[1-54]</sup>

- [1] Bhatnagar G, Sharma S, Kumar A, Prasad S, Agarwal S, Kar P. Reduced glutathione in hepatitis E infection and pregnancy outcome. *Journal of Obstetrics and Gynaecology Research* 2016;42:789-795.
- [2] Devi SG, Kumar A, Kar P, Husain SA, Sharma S. Association of pregnancy outcome with cytokine gene polymorphisms in HEV infection during pregnancy. *Journal of medical virology* 2014;86:1366-1376.
- [3] Javed NA, Ullah SH, Hussain N, Sheikh MA, Khan A, Ghafoor F, et al. Hepatitis e virus seroprevalence in pregnant women in Pakistan: Maternal and fetal outcomes. *Eastern Mediterranean Health Journal* 2017;23:559-563.
- [4] Kumar A, Devi SG, Kar P, Agarwal S, Husain SA, Gupta RK, et al. Association of cytokines in hepatitis E with pregnancy outcome. *Cytokine* 2014;65:95-104.
- [5] Patra S, Kumar A, Trivedi SS, Puri M, Sarin SK. Maternal and fetal outcomes in pregnant women with acute hepatitis E virus infection. *Annals of Internal Medicine* 2007;147:28-33.
- [6] Abebe M, Ali I, Ayele S, Overbo J, Aseffa A, Mihret A. Seroprevalence and risk factors of Hepatitis E Virus infection among pregnant women in Addis Ababa, Ethiopia. *PLoS ONE* 2017;12.
- [7] Adjei AA, Tettey Y, Aviyase JT, Adu-Gyamfi C, Obed S, Mingle JA, et al. Hepatitis e virus infection is highly prevalent among pregnant women in Accra, Ghana. *Virology Journal* 2009;6.
- [8] Ahmed RE, Karsany MS, Adam I. Brief report: Acute viral hepatitis and poor maternal and perinatal outcomes in pregnant Sudanese women. *Journal of medical virology* 2008;80:1747-1748.
- [9] Singla A, Mehta S, Rajaram S, Shree S. Materno-Fetal Outcomes with Viral Hepatitis in Pregnancy. *Journal of Obstetrics and Gynecology of India* 2016;66:166-169.
- [10] Banait VS, Sandur V, Parikh F, Muruges M, Ranka P, Ramesh VS, et al. Outcome of acute liver failure due to acute hepatitis E in pregnant women. *Indian Journal of Gastroenterology* 2007;26:6-10.
- [11] Beniwal M, Kumar A, Kar P, Jilani N, Sharma JB. Prevalence and severity of acute viral hepatitis and fulminant hepatitis during pregnancy: A prospective study from North India. *Indian Journal of Medical Microbiology* 2003;21:184-185.
- [12] Bhatia V, Singhal A, Panda SK, Acharya SK. A 20-year single-center experience with acute liver failure during pregnancy: Is the prognosis really worse? *Hepatology (Baltimore, Md)* 2008;48:1577-1585.
- [13] Bista BK, Rana A. Acute hepatitis E in pregnancy--study of 16 cases. *JNMA; journal of the Nepal Medical Association* 2006;45:182-185.

- [14] Borkakoti J, Hazam RK, Mohammad A, Kumar A, Kar P. Does high viral load of hepatitis E virus influence the severity and prognosis of acute liver failure during pregnancy? *Journal of medical virology* 2013;85:620-626.
- [15] Brohi ZP, Sadaf A, Perveen U. Etiology, clinical features and outcome of fulminant hepatic failure in pregnancy. *Journal of the Pakistan Medical Association* 2013;63:1168-1171.
- [16] Cordova CMMd, Blatt SL, Botelho TKR, Dalmarco EM. Sorologia para o vírus da Hepatite E em gestantes: clinicamente importante ou desnecessário? *Rev bras anal clin* 2007;39:269-273.
- [17] Cevrioglu AS, Altindis M, Tanir HM, Aksoy F. Investigation of the incidence of hepatitis E virus among pregnant women in Turkey. *Journal of Obstetrics and Gynaecology Research* 2004;30:48-52.
- [18] Changede P, Chavan N, Raj N, Gupta P. An Observational Study to Evaluate the Maternal and Foetal Outcomes in Pregnancies Complicated with Jaundice. *Journal of Obstetrics and Gynecology of India* 2018:1-6.
- [19] Cong W, Sui JC, Zhang XY, Qian AD, Chen J, Zhu XQ. Seroprevalence of hepatitis E virus among pregnant women and control subjects in China. *Journal of medical virology* 2015;87:446-450.
- [20] De Paschale M, Ceriani C, Romanò L, Cerulli T, Cagnin D, Cavallari S, et al. Epidemiology of hepatitis E virus infection during pregnancy in Benin. *Tropical Medicine and International Health* 2016;21:108-113.
- [21] Elduma AH, Osman WM. Dengue and hepatitis E virus infection in pregnant women in Eastern Sudan, A challenge for diagnosis in an endemic area. *Pan African Medical Journal* 2014;19.
- [22] Farshadpour F, Taherkhani R, Ravanbod MR, Eghbali SS, Taherkhani S, Mahdavi E. Prevalence, risk factors and molecular evaluation of hepatitis E virus infection among pregnant women resident in the northern shores of Persian Gulf, Iran. *PLoS ONE* 2018;13.
- [23] Hamid SS, Jafri SMW, Khan H, Shah H, Abbas Z, Fields H. Fulminant hepatic failure in pregnant women: Acute fatty liver or acute viral hepatitis? *Journal of Hepatology* 1996;25:20-27.
- [24] Hannachi N, Hidar S, Harrabi I, Mhalla S, Marzouk M, Ghzel H, et al. Seroprevalence and risk factors of hepatitis E among pregnant women in central Tunisia. *Pathologie Biologie* 2011;59:e115-e118.
- [25] Huang F, Ma T, Li L, Zeng W, Jing S. Low seroprevalence of hepatitis E virus infection in pregnant women in Yunnan, China. *The Brazilian journal of infectious diseases : an official publication of the Brazilian Society of Infectious Diseases* 2013;17:716-717.
- [26] Huang F, Wang J, Yang C, Long F, Li Y, Li L, et al. Chinese pregnant women in their third trimester are more susceptible to HEV infection. *The Brazilian journal of infectious diseases : an official publication of the Brazilian Society of Infectious Diseases* 2015;19:672-674.

- [27] Jaiswal SPB, Jain AK, Naik G, Soni N, Chitnis DS. Viral hepatitis during pregnancy. *International Journal of Gynecology and Obstetrics* 2001;72:103-108.
- [28] Jilani N, Das BC, Husain SA, Baweja UK, Chattopadhyaya D, Gupta RK, et al. Hepatitis E virus infection and fulminant hepatic failure during pregnancy. *Journal of Gastroenterology and Hepatology (Australia)* 2007;22:676-682.
- [29] Junaid SA, Agina SE, Abubakar KA. Epidemiology and associated risk factors of hepatitis E virus infection in Plateau State, Nigeria. *Virology: Research and Treatment* 2014;5:15-26.
- [30] Kar P, Jilani N, Husain SA, Pasha ST, Anand R, Rai A, et al. Does hepatitis E viral load and genotypes influence the final outcome of acute liver failure during pregnancy? *American Journal of Gastroenterology* 2008;103:2495-2501.
- [31] Khuroo MS, Kamili S. Aetiology, clinical course and outcome of sporadic acute viral hepatitis in pregnancy. *Journal of Viral Hepatitis* 2003;10:61-69.
- [32] Khuroo MS, Kamili S. Aetiology and prognostic factors in acute liver failure in India. *Journal of Viral Hepatitis* 2003;10:224-231.
- [33] Kumar A, Sharma S, Kar P, Agarwal S, Ramji S, Husain SA, et al. Impact of maternal nutrition in hepatitis E infection in pregnancy. *Archives of Gynecology and Obstetrics* 2017;296:885-895.
- [34] Kumar S, Pujhari SK, Chawla YK, Chakraborti A, Ratho RK. Molecular detection and sequence analysis of hepatitis E virus in patients with viral hepatitis from North India. *Diagnostic Microbiology and Infectious Disease* 2011;71:110-117.
- [35] Kumar RM, Uduman S, Rana S, Kochiyil JK, Usmani A, Thomas L. Sero-prevalence and mother-to-infant transmission of hepatitis E virus among pregnant women in the United Arab Emirates. *European Journal of Obstetrics Gynecology and Reproductive Biology* 2001;100:9-15.
- [36] Kumar N, Das V, Agarwal A, Pandey A, Agrawal S. Fetomaternal outcomes in pregnant women with hepatitis e infection; still an important fetomaternal killer with an unresolved mystery of increased virulence in pregnancy. *Turk Jinekoloji ve Obstetrik Dernegi Dergisi* 2017;14:106-113.
- [37] Kumar S, Ratho RK, Chawla YK, Chakraborti A. The incidence of sporadic viral hepatitis in North India: A preliminary study. *Hepatobiliary and Pancreatic Diseases International* 2007;6:596-599.
- [38] Kumar A, Beniwal M, Kar P, Sharma JB, Murthy NS. Hepatitis E in pregnancy. *International Journal of Gynecology and Obstetrics* 2004;85:240-244.
- [39] Lindemann MLM, Gabilondo G, Romero B, De La Maza OMS, Pérez-Gracia MT. Low prevalence of hepatitis E infection among pregnant women in Madrid, Spain. *Journal of medical virology* 2010;82:1666-1668.

- [40] Mahtab MA, Rahman S, Khan M, Mamum AA, Afroz S. Etiology of fulminant hepatic failure: Experience from a tertiary hospital in Bangladesh. *Hepatobiliary and Pancreatic Diseases International* 2008;7:161-164.
- [41] Neffatti H, Lebraud P, Hottélet C, Gharbi J, Challouf T, Roque-Afonso AM. Southern Tunisia: A still high endemicity area for hepatitis A. *PLoS ONE* 2017;12.
- [42] Obiri-Yeboah D, Awuku YA, Adu J, Pappoe F, Obboh E, Nsiah P, et al. Seroprevalence and risk factors for hepatitis E virus infection among pregnant women in the Cape Coast Metropolis, Ghana. *PLoS ONE* 2018;13.
- [43] Pujol FH, Favorov MO, Marcano T, Este JA, Magris M, Liprandi F, et al. Prevalence of antibodies against hepatitis E virus among urban and rural populations in Venezuela. *Journal of medical virology* 1994;42:234-236.
- [44] Rathi U, Bapat M, Rathi P, Abraham P. Effect of liver disease on maternal and fetal outcome a prospective study. *Indian Journal of Gastroenterology* 2007;26:59-63.
- [45] Renou C, Gobert V, Locher C, Moumen A, Timbely O, Savary J, et al. Prospective study of Hepatitis e Virus infection among pregnant women in France. *Virology Journal* 2014;11.
- [46] Sahai S, Mishra V, Ganga D, Jatav OP. Viral Hepatitis in Pregnancy--A study of its Effect on Maternal and Foetal Outcome. *The Journal of the Association of Physicians of India* 2015;63:28-33.
- [47] Salam GD, Kumar A, Kar P, Aggarwal S, Husain A, Sharma S. Serum tumor necrosis factor-alpha level in hepatitis E virus-related acute viral hepatitis and fulminant hepatic failure in pregnant women. *Hepatology Research* 2013;43:826-835.
- [48] Singh S, Mohanty A, Joshi YK, Deka D, Mohanty S, Panda SK. Mother-to-child transmission of hepatitis E virus infection. *Indian Journal of Pediatrics* 2003;70:37-39.
- [49] Solanke D, Rathi C, Pandey V, Patil M, Phadke A, Sawant P. Etiology, clinical profile, and outcome of liver disease in pregnancy with predictors of maternal mortality: A prospective study from Western India. *Indian Journal of Gastroenterology* 2016;35:450-458.
- [50] Strand RT, Franque-Ranque M, Bergström S, Weiland O. Infectious aetiology of jaundice among pregnant women in Angola. *Scandinavian Journal of Infectious Diseases* 2003;35:401-403.
- [51] Sultana R, Humayun S. Fetomaternal outcome in acute hepatitis E. *Journal of the College of Physicians and Surgeons Pakistan* 2014;24:127-130.
- [52] Surya IGP, Kornia K, Suwardewa TGA, Mulyanto, Tsuda F, Mishiro S. Serological markers of hepatitis B, C, and E viruses and human immunodeficiency virus type-1 infections in pregnant women in Bali, Indonesia. *Journal of medical virology* 2005;75:499-503.
- [53] Tejada-Strop A, Tohme RA, Andre-Alboth J, Childs L, Ji X, De Oliveira Landgraf De Castro V, et al. Seroprevalence of Hepatitis A and Hepatitis e viruses among pregnant women in Haiti. *American Journal of Tropical Medicine and Hygiene* 2019;101:230-232.



[54] Modiyinji AF, Amougou-Atsama M, Monamele CG, Nola M, Njouom R. Seroprevalence of hepatitis E virus antibodies in different human populations of Cameroon. *Journal of Medical Virology* 2019;91:1989-1994.
